# Supplementary material for: NAD+ Precursors Repair Mitochondrial Function in Diabetes and Prevent Experimental Diabetic Neuropathy
Source: MDPI journal article supplement (doi:10.3390/ijms23094887), 2022-04-28
Supplement: s1 [file s1]

## Supplementary Data

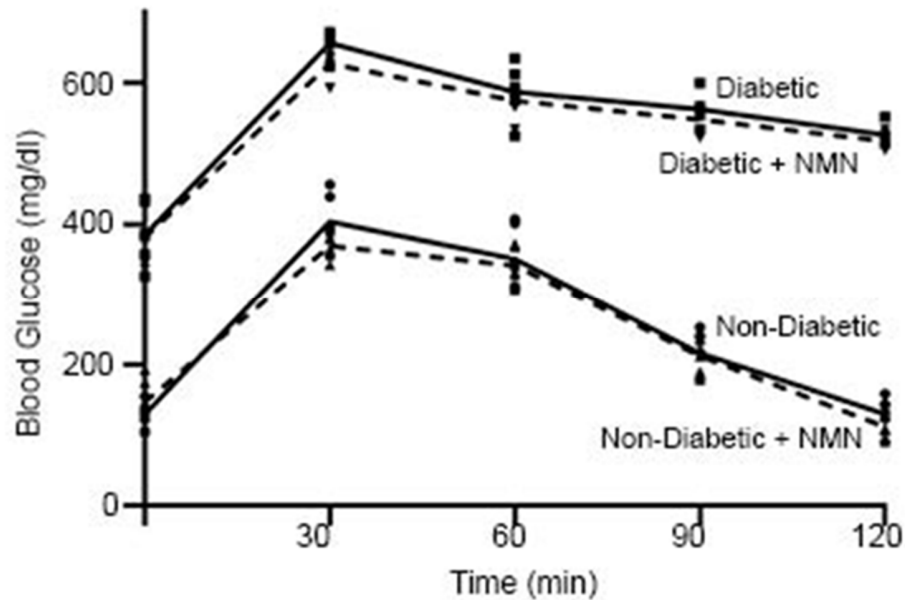

**Figure S1.** Intra-peritoneal glucose tolerance test was done as described in Ref 11. Statistical data for area under the curve for the glucose tolerance test is showed significant differences between non-diabetic and STZ diabetic mice (Area Under the Curve =  $\text{mg} \cdot \text{min} / \text{dL} \times 10^3$ ); non-diabetic =  $3.6 \pm 0.3$  vs. STZ mice  $9.1 \pm 1.0$  but not between STZ and STZ+NMN ( $8.9 \pm 0.8$ ).

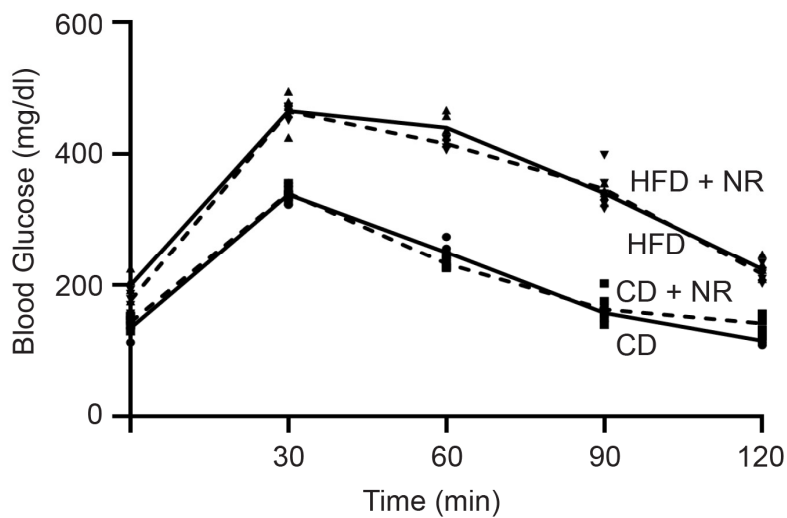

**Figure S2.** The intra-peritoneal glucose tolerance test was conducted as described in [11]. Statistical data for area under the curve for the glucose tolerance test showed significant differences between CD- and HFD-fed mice, but there was no significant difference in the AUC between HFD and HFD + NR mice. The statistical significance is shown in Table 3.
